# Supplementary figures and images for: Cost-effectiveness of therapist-guided internet-delivered cognitive behaviour therapy for paediatric obsessive–compulsive disorder: results from a randomised controlled trial
Source: PubMed Central journal article supplement — BMJ Open. 2017 May 17;7(5):e015246. doi: 10.1136/bmjopen-2016-015246 (PMC5729979; doi:10.1136/bmjopen-2016-015246), 2017-05-17

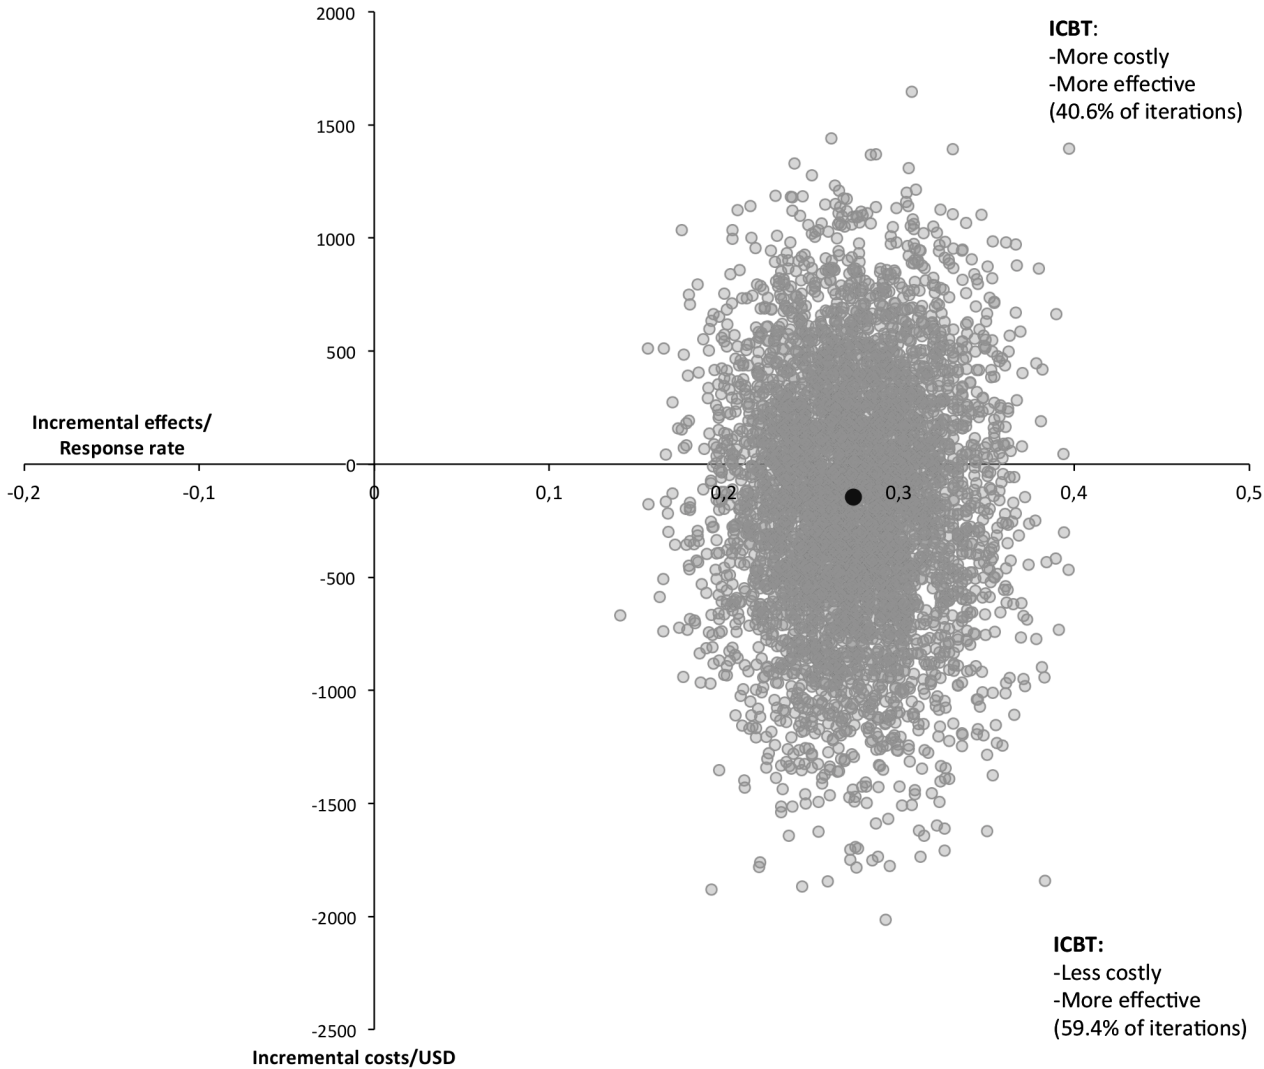

Supplement: bmjopen-2016-015246supp004.pdf [file bmjopen-2016-015246supp004.pdf]

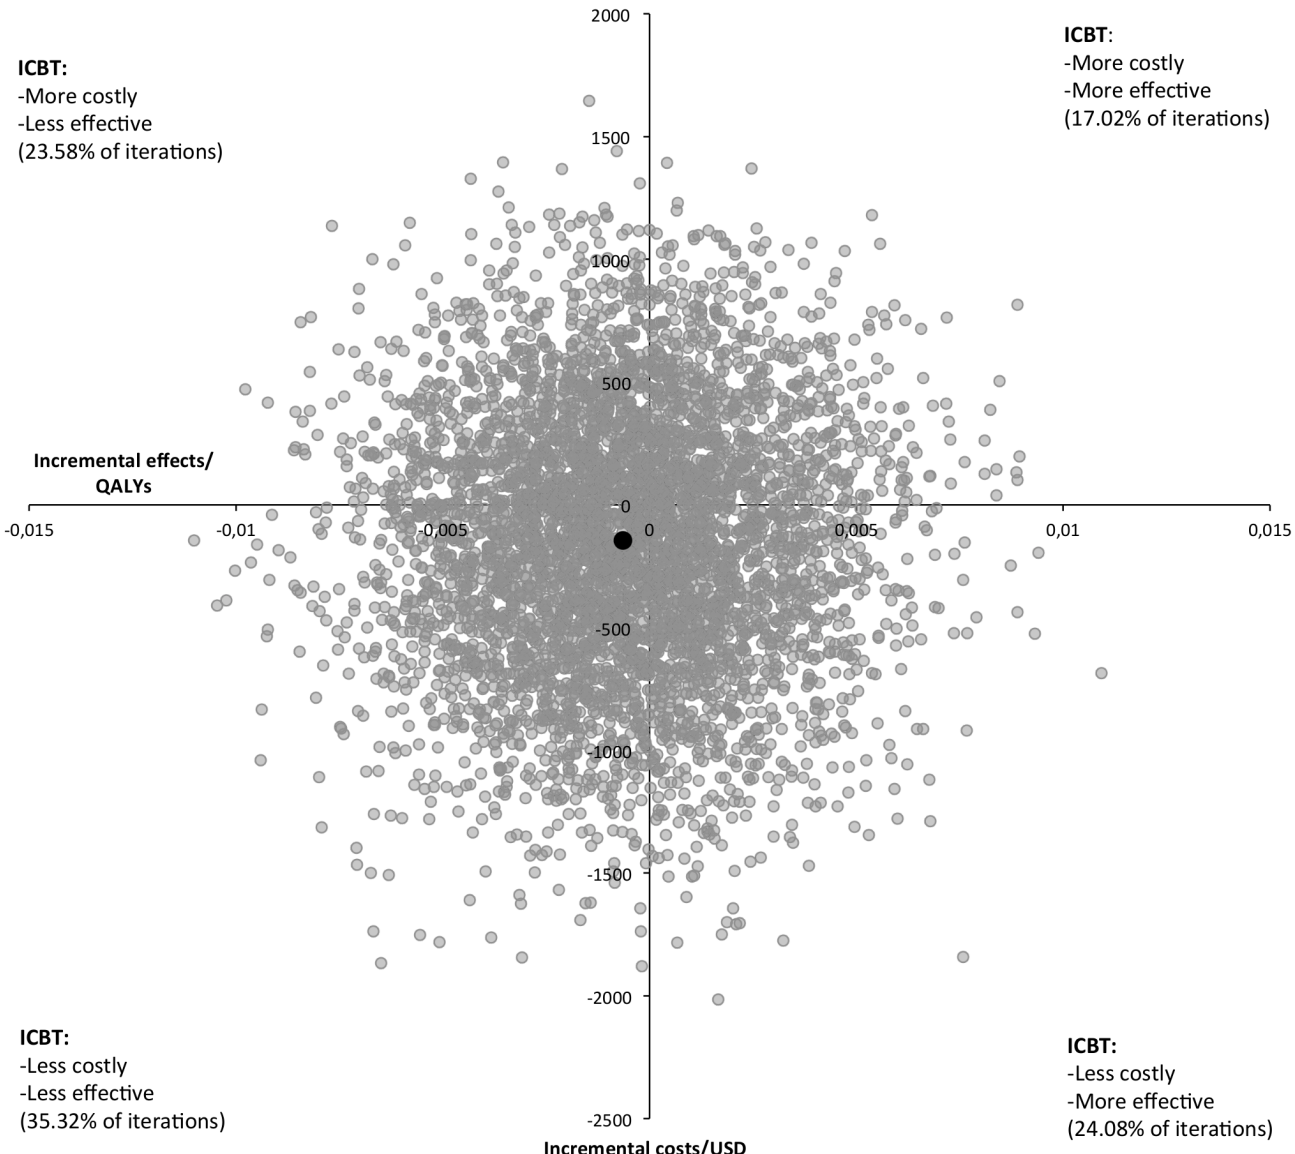

Supplement: bmjopen-2016-015246supp005.pdf [file bmjopen-2016-015246supp005.pdf]
